# Supplementary material for: Association of the US Food and Drug Administration Antipsychotic Drug Boxed Warning With Medication Use and Health Outcomes in Elderly Patients With Dementia
Source: PubMed Central journal article supplement — JAMA Netw Open. 2020 Apr 28;3(4):e203630. doi: 10.1001/jamanetworkopen.2020.3630 (PMC7189225; doi:10.1001/jamanetworkopen.2020.3630), 2020-04-28
Supplement: jamanetwopen-3-e203630-s001.pdf [file jamanetwopen-3-e203630-s001.pdf]

## Supplementary Online Content

Rubino A, Sanon M, Ganz ML, et al. Association of the US Food and Drug Administration antipsychotic drug boxed warning with medication use and health outcomes in elderly patients with dementia. *JAMA Netw Open*. 2020;3(4):e203630. doi:10.1001/jamanetworkopen.2020.3630

**eTable 1.** International Classification of Diseases, Ninth Revision, Clinical Modification (ICD-9-CM) Codes Used to Identify Dementia and Health Outcomes

**eTable 2.** Demographic Characteristics of Elderly Individuals With Dementia in MEPS

**eTable 3.** Demographic Characteristics of Elderly Individuals with Dementia in NAMCS/NHAMCS

**eTable 4.** Drug Listings for Each Pharmacological Class

**eTable 5.** Annual Weighted Data from MEPS

**eTable 6.** Annual Weighted Data from NAMCS/NHAMCS

**eTable 7.** Three-Year Moving Averages from MEPS

**eTable 8.** Three-Year Moving Averages from NAMCS/NHAMCS

**eAppendix.** Interrupted Time-Series Analyses

**eFigure.** Proportion of Elderly Individuals with Dementia Who Have Used Antidementia Medications (MEPS) and Proportion of Visits for AD Recording Use of Antidementia Medications (NAMCS/NHAMCS)

This supplementary material has been provided by the authors to give readers additional information about their work.

**eTable 1.** International Classification of Diseases, Ninth Revision, Clinical Modification (ICD-9-CM) Codes Used to Identify Dementia and Health Outcomes

| ICD-9-CM Codes                                    | Diagnoses                                                                  |
|---------------------------------------------------|----------------------------------------------------------------------------|
| 331.0                                             | Alzheimer's disease                                                        |
| 331.82                                            | Dementia with Lewy bodies                                                  |
| 290.0                                             | Senile dementia, uncomplicated                                             |
| 290.10                                            | Presenile dementia, uncomplicated                                          |
| 290.11                                            | Presenile dementia with delirium                                           |
| 290.12                                            | Presenile dementia with delusional features                                |
| 290.13                                            | Presenile dementia with depressive features                                |
| 290.20                                            | Senile dementia with delusional features                                   |
| 290.21                                            | Senile dementia with depressive features                                   |
| 290.3                                             | Senile dementia with delirium                                              |
| 290.40                                            | Vascular dementia, uncomplicated                                           |
| 290.41                                            | Vascular dementia, with delirium                                           |
| 290.42                                            | Vascular dementia, with delusions                                          |
| 290.43                                            | Vascular dementia, with depressed mood                                     |
| 294.0                                             | Amnestic disorder in conditions classified elsewhere                       |
| 294.10                                            | Dementia in conditions classified elsewhere without behavioral disturbance |
| 294.8                                             | Other persistent mental disorders due to conditions classified elsewhere   |
| 331.11                                            | Pick's disease                                                             |
| 331.19                                            | Other frontotemporal dementia                                              |
| 331.2                                             | Senile degeneration of brain                                               |
| 331.7                                             | Cerebral degeneration in diseases classified elsewhere                     |
| 797                                               | Senility without psychosis                                                 |
| 410.X, 411.X, 413.X, 414.X, 429.X, V45.81, V45.82 | Myocardial infarction, ischemic heart disease, or coronary ischemia        |

|                                                                                                                 |                                     |
|-----------------------------------------------------------------------------------------------------------------|-------------------------------------|
| 430.X, 431, 432.X,<br>433.01, 433.11,<br>433.21, 433.31,<br>433.81, 433.91,<br>434.01, 434.11,<br>434.91, 435.X | Stroke or transient ischemic attack |
|-----------------------------------------------------------------------------------------------------------------|-------------------------------------|

**eTable 2.** Demographic Characteristics of Elderly Individuals With Dementia in MEPS

| Calendar Year                 | 1996          | 1997          | 1998          | 1999          | 2000          | 2001          | 2002          | 2003          | 2004          | 2005          | 2006          | 2007          | 2008          | 2009          | 2010          | 2011          | 2012          | 2013          | 2014          |      |
|-------------------------------|---------------|---------------|---------------|---------------|---------------|---------------|---------------|---------------|---------------|---------------|---------------|---------------|---------------|---------------|---------------|---------------|---------------|---------------|---------------|------|
| <b>Unweighted Sample Size</b> | 68            | 134           | 98            | 78            | 79            | 119           | 148           | 121           | 132           | 158           | 179           | 142           | 131           | 159           | 146           | 126           | 147           | 135           | 130           |      |
| <b>Sex</b>                    |               |               |               |               |               |               |               |               |               |               |               |               |               |               |               |               |               |               |               |      |
| Male, % (N*)                  | 23<br>(11)    | 23<br>(24)    | 25<br>(22)    | 40<br>(27)    | 34<br>(27)    | 28<br>(35)    | 30<br>(39)    | 26<br>(31)    | 34<br>(42)    | 30<br>(43)    | 30<br>(56)    | 39<br>(58)    | 36<br>(43)    | 27<br>(44)    | 36<br>(57)    | 44<br>(56)    | 41<br>(59)    | 38<br>(49)    | 34<br>(44)    |      |
| Female, % (N*)                | 78<br>(57)    | 78<br>(110)   | 75<br>(76)    | 60<br>(51)    | 66<br>(52)    | 72<br>(84)    | 70<br>(109)   | 74<br>(90)    | 66<br>(90)    | 70<br>(115)   | 70<br>(123)   | 61<br>(84)    | 65<br>(88)    | 73<br>(115)   | 64<br>(89)    | 56<br>(70)    | 59<br>(88)    | 62<br>(86)    | 66<br>(86)    |      |
| <b>Age</b>                    |               |               |               |               |               |               |               |               |               |               |               |               |               |               |               |               |               |               |               |      |
| Mean (SD)                     | 83.2<br>(3.0) | 82.8<br>(2.8) | 81.9<br>(2.8) | 83.4<br>(2.8) | 82.3<br>(2.6) | 81.2<br>(2.8) | 80.4<br>(2.9) | 80.3<br>(2.5) | 80.8<br>(2.9) | 81.2<br>(3.1) | 81.4<br>(3.2) | 81.8<br>(2.9) | 81.0<br>(3.1) | 80.4<br>(3.0) | 81.2<br>(3.1) | 81.5<br>(3.0) | 81.5<br>(3.0) | 80.5<br>(2.8) | 80.7<br>(2.8) |      |
| Minimum                       | 66.0          | 65.0          | 65.0          | 66.0          | 65.0          | 66.0          | 65.0          | 65.0          | 65.0          | 65.0          | 65.0          | 66.0          | 65.0          | 65.0          | 65.0          | 65.0          | 65.0          | 65.0          | 65.0          | 65.0 |
| 25th percentile               | 79.2          | 78.0          | 78.1          | 79.7          | 77.5          | 77.7          | 75.8          | 76.6          | 77.4          | 78.0          | 78.6          | 79.3          | 78.9          | 76.3          | 78.5          | 78.4          | 78.7          | 77.6          | 77.0          |      |
| Median                        | 83.3          | 83.7          | 81.5          | 84.3          | 82.9          | 83.6          | 81.5          | 81.3          | 83.0          | 82.4          | 82.7          | 83.9          | 82.3          | 82.2          | 83.1          | 83.9          | 84.1          | 83.2          | 83.8          |      |
| 75th percentile               | 86.7          | 88.0          | 86.6          | 87.8          | 87.0          | 84.5          | 84.3          | 84.4          | 84.4          | 84.4          | 84.5          | 84.5          | 84.3          | 84.3          | 84.5          | 84.5          | 84.6          | 84.5          | 84.5          |      |
| Maximum                       | 90.0          | 90.0          | 90.0          | 90.0          | 90.0          | 85.0          | 85.0          | 85.0          | 85.0          | 85.0          | 85.0          | 85.0          | 85.0          | 85.0          | 85.0          | 85.0          | 85.0          | 85.0          | 85.0          |      |
| <b>Ethnicity</b>              |               |               |               |               |               |               |               |               |               |               |               |               |               |               |               |               |               |               |               |      |
| Hispanic, % (N*)              | 2<br>(4)      | 7<br>(19)     | 8<br>(15)     | 5<br>(8)      | 4<br>(10)     | 8<br>(21)     | 6<br>(24)     | 10<br>(29)    | 10<br>(32)    | 6<br>(25)     | 10<br>(40)    | 16<br>(35)    | 8<br>(17)     | 9<br>(21)     | 10<br>(19)    | 10<br>(22)    | 11<br>(36)    | 13<br>(37)    | 6<br>(19)     |      |
| Non-Hispanic, % (N*)          | 98<br>(64)    | 93<br>(115)   | 92<br>(83)    | 95<br>(70)    | 96<br>(69)    | 92<br>(98)    | 94<br>(124)   | 91<br>(92)    | 90<br>(100)   | 94<br>(133)   | 90<br>(139)   | 84<br>(107)   | 92<br>(114)   | 91<br>(138)   | 90<br>(127)   | 90<br>(104)   | 89<br>(111)   | 87<br>(98)    | 95<br>(111)   |      |
| <b>Race</b>                   |               |               |               |               |               |               |               |               |               |               |               |               |               |               |               |               |               |               |               |      |
| White, % (N*)                 | 94<br>(61)    | 91<br>(114)   | 85<br>(75)    | 87<br>(61)    | 88<br>(68)    | 88<br>(100)   | 80<br>(110)   | 83<br>(92)    | 85<br>(105)   | 83<br>(118)   | 84<br>(140)   | 84<br>(108)   | 78<br>(85)    | 78<br>(102)   | 83<br>(102)   | 84<br>(90)    | 78<br>(102)   | 82<br>(93)    | 78<br>(79)    |      |
| Black, % (N*)                 | 6 (7)         | 9<br>(19)     | 13<br>(20)    | 13<br>(17)    | 12<br>(11)    | 11<br>(17)    | 14<br>(30)    | 15<br>(26)    | 14<br>(24)    | 15<br>(35)    | 15<br>(36)    | 12<br>(27)    | 16<br>(35)    | 15<br>(46)    | 12<br>(36)    | 11<br>(28)    | 12<br>(30)    | 10<br>(24)    | 15<br>(37)    |      |
| Other % (N*)                  | NA            | 0 (1)         | 3 (3)         | NA            | NA            | 2 (2)         | 7 (8)         | 2 (3)         | 2 (3)         | 2 (5)         | 1 (3)         | 4 (7)         | 6<br>(11)     | 7<br>(11)     | 4 (8)         | 5 (8)         | 10<br>(15)    | 8<br>(18)     | 8<br>(14)     |      |
| <b>MSA</b>                    |               |               |               |               |               |               |               |               |               |               |               |               |               |               |               |               |               |               |               |      |
| Yes, % (N*)                   | 73<br>(45)    | 70<br>(85)    | 75<br>(69)    | 77<br>(60)    | 75<br>(58)    | 67<br>(73)    | 72<br>(100)   | 78<br>(96)    | 82<br>(106)   | 77<br>(114)   | 72<br>(118)   | 83<br>(109)   | 77<br>(96)    | 76<br>(112)   | 72<br>(106)   | 76<br>(103)   | 81<br>(120)   | NA            | NA            |      |
| No, % (N*)                    | 28<br>(23)    | 30<br>(49)    | 25<br>(29)    | 23<br>(18)    | 26<br>(21)    | 33<br>(46)    | 28<br>(48)    | 22<br>(25)    | 18<br>(26)    | 23<br>(44)    | 28<br>(61)    | 17<br>(33)    | 24<br>(35)    | 24<br>(47)    | 28<br>(40)    | 24<br>(23)    | 19<br>(27)    | NA            | NA            |      |
| <b>Geographic region</b>      |               |               |               |               |               |               |               |               |               |               |               |               |               |               |               |               |               |               |               |      |
| Northeast, % (N*)             | 21<br>(17)    | 20<br>(28)    | 16<br>(15)    | 32<br>(20)    | 19<br>(15)    | 27<br>(23)    | 28<br>(29)    | 19<br>(18)    | 20<br>(23)    | 26<br>(28)    | 17<br>(22)    | 18<br>(20)    | 21<br>(25)    | 19<br>(24)    | 22<br>(24)    | 18<br>(19)    | 23<br>(28)    | 26<br>(29)    | 26<br>(24)    |      |
| Midwest, % (N*)               | 37<br>(22)    | 21<br>(27)    | 30<br>(25)    | 17<br>(17)    | 29<br>(18)    | 18<br>(21)    | 23<br>(27)    | 18<br>(17)    | 14<br>(20)    | 13<br>(16)    | 21<br>(29)    | 21<br>(26)    | 20<br>(26)    | 20<br>(29)    | 19<br>(31)    | 13<br>(17)    | 20<br>(25)    | 21<br>(18)    | 18<br>(24)    |      |

| Calendar Year | 1996       | 1997       | 1998       | 1999       | 2000       | 2001       | 2002       | 2003       | 2004       | 2005       | 2006       | 2007       | 2008       | 2009       | 2010       | 2011       | 2012       | 2013       | 2014       |
|---------------|------------|------------|------------|------------|------------|------------|------------|------------|------------|------------|------------|------------|------------|------------|------------|------------|------------|------------|------------|
| West, % (N*)  | 31<br>(19) | 42<br>(54) | 40<br>(40) | 27<br>(27) | 35<br>(32) | 32<br>(51) | 30<br>(61) | 38<br>(56) | 41<br>(61) | 38<br>(81) | 43<br>(96) | 41<br>(67) | 37<br>(54) | 39<br>(69) | 37<br>(61) | 41<br>(54) | 38<br>(65) | 40<br>(62) | 41<br>(55) |
| South, % (N*) | 11<br>(10) | 17<br>(25) | 14<br>(18) | 24<br>(14) | 17<br>(14) | 24<br>(24) | 20<br>(31) | 25<br>(30) | 24<br>(28) | 23<br>(33) | 19<br>(32) | 20<br>(29) | 22<br>(26) | 23<br>(37) | 22<br>(30) | 29<br>(36) | 19<br>(29) | 13<br>(26) | 15<br>(27) |

Abbreviations: MEPS, Medical Expenditure Panel Survey; MSA, metropolitan statistical area.

\*Unweighted sample sizes (N) provided; summary statistics have been weighted.

**eTable 3.** Demographic Characteristics of Elderly Individuals with Dementia in NAMCS/NHAMCS

| Calendar Year                 | 1996        | 1997        | 1998        | 1999        | 2000        | 2001        | 2002        | 2003        | 2004        | 2005        | 2006        | 2007        | 2008        | 2009        | 2010        | 2011        | 2012        | 2013        | 2014        |
|-------------------------------|-------------|-------------|-------------|-------------|-------------|-------------|-------------|-------------|-------------|-------------|-------------|-------------|-------------|-------------|-------------|-------------|-------------|-------------|-------------|
| <b>Unweighted Sample Size</b> | 165         | 210         | 227         | 177         | 223         | 245         | 285         | 294         | 291         | 254         | 275         | 345         | 313         | 268         | 294         | 312         | 153         | 121         | 134         |
| <b>Sex</b>                    |             |             |             |             |             |             |             |             |             |             |             |             |             |             |             |             |             |             |             |
| Female, % (N*)                | 50<br>(97)  | 65<br>(117) | 67<br>(172) | 60<br>(108) | 59<br>(140) | 55<br>(153) | 67<br>(185) | 62<br>(185) | 65<br>(171) | 73<br>(159) | 68<br>(172) | 62<br>(218) | 61<br>(215) | 68<br>(167) | 64<br>(184) | 62<br>(183) | 62<br>(91)  | 59<br>(70)  | 65<br>(87)  |
| Male, % (N*)                  | 50<br>(68)  | 35<br>(93)  | 33<br>(55)  | 41<br>(69)  | 42<br>(83)  | 45<br>(92)  | 33<br>(100) | 38<br>(109) | 36<br>(120) | 28<br>(95)  | 32<br>(103) | 38<br>(127) | 39<br>(98)  | 33<br>(101) | 36<br>(110) | 38<br>(129) | 38<br>(62)  | 41<br>(51)  | 35<br>(47)  |
| <b>Age</b>                    |             |             |             |             |             |             |             |             |             |             |             |             |             |             |             |             |             |             |             |
| Mean (SD)                     | 79<br>(2)   | 81<br>(2)   | 81<br>(2)   | 79<br>(2)   | 82<br>(2)   | 79<br>(2)   | 81<br>(2)   | 80<br>(2)   | 80<br>(2)   | 81<br>(2)   | 80<br>(2)   | 81<br>(2)   | 82<br>(2)   | 82<br>(3)   | 82<br>(2)   | 83<br>(2)   | 82<br>(1)   | 82<br>(2)   | 83<br>(2)   |
| Minimum                       | 65          | 65          | 65          | 65          | 65          | 65          | 65          | 65          | 65          | 65          | 65          | 65          | 65          | 65          | 65          | 65          | 65          | 65          | 65          |
| 25th percentile               | 74          | 75          | 75          | 73          | 76          | 73          | 75          | 75          | 77          | 76          | 75          | 76          | 75          | 77          | 77          | 78          | 77          | 78          | 79          |
| Median                        | 80          | 80          | 81          | 80          | 81          | 77          | 80          | 80          | 80          | 81          | 80          | 81          | 81          | 82          | 81          | 83          | 82          | 82          | 84          |
| 75th percentile               | 84          | 85          | 86          | 84          | 86          | 83          | 85          | 85          | 84          | 85          | 84          | 86          | 87          | 86          | 88          | 87          | 87          | 86          | 88          |
| Maximum                       | 96          | 98          | 100         | 99          | 100         | 100         | 95          | 100         | 100         | 98          | 100         | 100         | 100         | 100         | 100         | 93          | 92          | 93          | 93          |
| <b>Ethnicity</b>              |             |             |             |             |             |             |             |             |             |             |             |             |             |             |             |             |             |             |             |
| Hispanic, % (N*)              | 12<br>(13)  | 6 (8)       | 2<br>(11)   | 8<br>(17)   | 2 (9)       | 5<br>(22)   | 14<br>(26)  | 3<br>(22)   | 7<br>(35)   | 4 (12)      | 6 (18)      | 8 (20)      | 9<br>(30)   | 15<br>(43)  | 8<br>(30)   | 5<br>(27)   | 5 (7)       | 7 (8)       | 14<br>(11)  |
| Non-Hispanic, % (N*)          | 88<br>(152) | 70<br>(172) | 79<br>(162) | 80<br>(134) | 75<br>(168) | 86<br>(192) | 79<br>(237) | 97<br>(272) | 93<br>(256) | 96<br>(242) | 94<br>(257) | 93<br>(325) | 91<br>(283) | 85<br>(225) | 92<br>(264) | 95<br>(285) | 95<br>(146) | 93<br>(113) | 86<br>(123) |
| <b>Race</b>                   |             |             |             |             |             |             |             |             |             |             |             |             |             |             |             |             |             |             |             |
| White, % (N*)                 | 85<br>(125) | 77<br>(165) | 90<br>(170) | 93<br>(151) | 94<br>(182) | 93<br>(202) | 95<br>(232) | 71<br>(231) | 90<br>(249) | 93<br>(217) | 86<br>(228) | 88<br>(265) | 87<br>(263) | 92<br>(233) | 85<br>(237) | 84<br>(259) | 92<br>(138) | 86<br>(103) | 89<br>(119) |
| Black, % (N*)                 | 13<br>(35)  | 19<br>(42)  | 10<br>(51)  | 7<br>(25)   | 5<br>(32)   | 4<br>(34)   | 4<br>(42)   | 20<br>(51)  | 8<br>(36)   | 3<br>(25)   | 7<br>(31)   | 10<br>(68)  | 6<br>(32)   | 8<br>(25)   | 11<br>(45)  | 10<br>(37)  | 6<br>(11)   | 5<br>(10)   | 6<br>(11)   |
| Other % (N*)                  | 1 (5)       | 4 (3)       | 1 (6)       | 1 (1)       | 1 (9)       | 4 (9)       | 1<br>(11)   | 8<br>(12)   | 2 (6)       | 4<br>(12)   | 8<br>(16)   | 2<br>(12)   | 8<br>(18)   | 1<br>(10)   | 4<br>(12)   | 6<br>(16)   | 3 (4)       | 9 (8)       | 5 (4)       |
| <b>Region</b>                 |             |             |             |             |             |             |             |             |             |             |             |             |             |             |             |             |             |             |             |
| Northeast, % (N*)             | 21<br>(44)  | 10<br>(34)  | 21<br>(74)  | 16<br>(44)  | 22<br>(43)  | 38<br>(92)  | 14<br>(59)  | 25<br>(72)  | 35<br>(85)  | 16<br>(54)  | 23<br>(53)  | 23<br>(89)  | 14<br>(90)  | 15<br>(77)  | 11<br>(63)  | 10<br>(63)  | 17<br>(6)   | 20<br>(5)   | 22<br>(2)   |
| Midwest, % (N*)               | 27<br>(34)  | 29<br>(64)  | 28<br>(52)  | 21<br>(36)  | 39<br>(74)  | 8<br>(35)   | 21<br>(63)  | 22<br>(47)  | 20<br>(55)  | 25<br>(51)  | 24<br>(64)  | 18<br>(72)  | 24<br>(52)  | 31<br>(58)  | 30<br>(66)  | 17<br>(69)  | 20<br>(5)   | 21<br>(5)   | 25<br>(9)   |
| South, % (N*)                 | 29<br>(41)  | 41<br>(73)  | 36<br>(64)  | 44<br>(72)  | 23<br>(55)  | 38<br>(78)  | 34<br>(95)  | 29<br>(104) | 21<br>(93)  | 37<br>(109) | 34<br>(86)  | 39<br>(106) | 39<br>(113) | 44<br>(104) | 27<br>(90)  | 54<br>(116) | 19<br>(4)   | 35<br>(7)   | 42<br>(13)  |
| West, % (N*)                  | 23<br>(46)  | 20<br>(39)  | 15<br>(37)  | 19<br>(25)  | 16<br>(51)  | 16<br>(40)  | 31<br>(68)  | 25<br>(71)  | 24<br>(58)  | 22<br>(40)  | 20<br>(72)  | 20<br>(78)  | 23<br>(58)  | 10<br>(29)  | 32<br>(75)  | 19<br>(64)  | 44<br>(7)   | 25<br>(3)   | 11<br>(4)   |

Abbreviations: NAMCS, National Ambulatory Medical Care Survey; NHAMCS, National Hospital Ambulatory Medical Care Survey; SD, standard deviation.  
\*Unweighted sample sizes (N) provided; summary statistics have been weighted.

**eTable 4.** Drug Listings for Each Pharmacological Class

| <b>Antipsychotics</b>             | <b>Hypnotics</b>           | <b>Antidepressants</b> | <b>Antiepileptics</b>    |
|-----------------------------------|----------------------------|------------------------|--------------------------|
|                                   |                            |                        |                          |
| <b>Combination</b>                | <b>Benzodiazepines</b>     | Amitriptyline (1977)   | Carbamazepine (1968)     |
| Olanzapine/fluoxetine (2009)      | Alprazolam (1981)          | Amoxapine (1992)       | Clobazam (2011)          |
| Perphenazine/amitriptyline (1969) | Chlordiazepoxide (1960)    | Bupropion (1985)       | Clonazepam (1997)        |
|                                   | Clonazepam (1975)          | Citalopram (1988)      | Diazepam (1963)          |
| <b>Conventional/typical</b>       | Clorazepate (1987)         | Clomipramine (1989)    | Divalproex sodium (1983) |
| Chlorpromazine (1957)             | Diazepam (1963)            | Desipramine (1964)     | Ethosuximide (1974)      |
| Fluphenazine (1960)               | Estazolam (1997)           | Desvenlafaxine (2008)  | Ethotoin (1957)          |
| Haloperidol (1967)                | Flunitrazepam (??)         | Doxepin (2010)         | Ezogabine (2011)         |
| Levomepromazine (??)              | Flurazepam (1986)          | Duloxetine (2004)      | Felbamate (2015)         |
| Loxapine (2012)                   | Lorazepam (1980)           | Escitalopram (2002)    | Fosphenytoin (1996)      |
| Mesoridazine (1994)               | Midazolam (2000)           | Fluoxetine (1987)      | Gabapentin (1993)        |
| Molindone (1974)                  | Oxazepam (1988)            | Fluvoxamine (2007)     | Lacosamide (2008)        |
| Perphenazine (1957)               | Prazepam (1980)            | Imipramine (20012)     | Lamotrigine (1994)       |
| Pimozide (1985)                   | Quazepam (1985)            | Isocarboxazid (1959)   | Levetiracetam (1999)     |
| Promazine (1951)                  | Temazepam (1981)           | Maprotiline (1988)     | Lorazepam (1977)         |
| Thioridazine (1986)               | Triazolam (1982)           | Mirtazapine (1996)     | Oxcarbazepine (2000)     |
| Thiothixene (1967)                |                            | Nefazodone (2003)      | Phenobarbital (1994)     |
| Trifluoperazine (1997)            | <b>Non-benzodiazepines</b> | Nortriptyline (1977)   | Phenytoin (1956)         |
| Triflupromazine (1981)            | Eszopiclone (2004)         | Paroxetine (2001)      | Pregabalin (2004)        |
|                                   | Ramelteon (2005)           | Phenelzine (1961)      | Primidone (2008)         |
| <b>Atypical</b>                   | Zaleplon (1999)            | Protriptyline (1973)   | Rufinamide (2008)        |
| Aripiprazole (2002)               | Zolpidem (1992)            | Selegiline (1997)      | Tiagabine (1997)         |
| Asenapine (2009)                  |                            | Sertraline (1991)      | Topiramate (1999)        |
| Brexipiprazole (2015)             | <b>Barbiturates</b>        | Tranylcypromine (1961) | Valproate sodium (1983)  |
| Clozapine (1989)                  | Allobarbitol (1963)        | Trazodone (1981)       | Valproic acid (2008)     |
| Iloperidone (2009)                | Alphenal ( ??)             | Trimipramine (1979)    | Vigabatrin (2009)        |
| Lurasidone (2010)                 | Amobarbital (1958)         | Venlafaxine (1997)     | Zonisamide (2009)        |
| Olanzapine (2003)                 | Aprobarbital ( ??)         | Vilazodone(2011)       |                          |
| Paliperidone (2009)               | Barbital (1953)            |                        |                          |
| Quetiapine (1997)                 | Brallobarbitol ( ??)       | <b>Antidementia</b>    | <b>Opioids</b>           |
| Risperidone (1993)                | Henobarbital (??)          | Donepezil (1996)       | Codeine (1840)           |
| Ziprasidone (2001)                | Pentobarbital (1973)       | Galantamine (2001)     | Fentanyl (2005)          |
|                                   | Secobarbital (1973)        | Memantine (2003)       | Hydrocodone (1943)       |
|                                   |                            | Rivastigmine (2000)    | Hydromorphone (1984)     |
|                                   |                            |                        | Levorphanol (2000)       |



|  |  |  |                    |
|--|--|--|--------------------|
|  |  |  | Meperidine (1942)  |
|  |  |  | Methadone (1947)   |
|  |  |  | Morphine (1830)    |
|  |  |  | Oxycodone (1939)   |
|  |  |  | Oxymorphone (1959) |
|  |  |  | Pentazocine (1967) |
|  |  |  | Tramadol (1995)    |

**eTable 5. Annual Weighted Data from MEPS**

| Calendar Year                         | 1996 | 1997 | 1998 | 1999 | 2000 | 2001 | 2002 | 2003 | 2004 | 2005 | 2006 | 2007 | 2008 | 2009 | 2010 | 2011 | 2012 | 2013 | 2014 |
|---------------------------------------|------|------|------|------|------|------|------|------|------|------|------|------|------|------|------|------|------|------|------|
| <b>Unweighted Sample Size</b>         | 68   | 134  | 98   | 78   | 79   | 119  | 148  | 121  | 132  | 158  | 179  | 142  | 131  | 159  | 146  | 126  | 147  | 135  | 130  |
| <b>Medication Use, %</b>              |      |      |      |      |      |      |      |      |      |      |      |      |      |      |      |      |      |      |      |
| Antipsychotic                         | 0.6  | 4.6  | 0.0  | 4.5  | 5.3  | 12.5 | 8.9  | 3.3  | 10.6 | 5.9  | 11.0 | 12.0 | 11.5 | 13.7 | 9.8  | 8.4  | 4.4  | 10.0 | 17.6 |
| Atypical antipsychotic                | 0.0  | 1.6  | 0.0  | 4.5  | 4.6  | 12.5 | 8.2  | 3.3  | 10.6 | 5.1  | 9.0  | 11.5 | 11.0 | 12.2 | 7.8  | 6.8  | 3.9  | 9.7  | 15.4 |
| Typical antipsychotic                 | 0.6  | 3.0  | 0.0  | 0.0  | 0.8  | 0.0  | 0.7  | 0.0  | 0.0  | 0.8  | 2.0  | 1.0  | 1.6  | 1.9  | 2.0  | 2.2  | 0.5  | 0.3  | 2.2  |
| Psychiatric meds/opioids              | 50.0 | 49.1 | 40.3 | 37.4 | 49.8 | 42.3 | 58.8 | 71.5 | 69.1 | 65.5 | 75.2 | 72.8 | 73.8 | 68.7 | 72.9 | 75.3 | 71.9 | 79.1 | 80.0 |
| Hypnotic                              | 23.5 | 22.0 | 14.6 | 17.6 | 7.2  | 14.3 | 18.0 | 20.8 | 15.2 | 10.5 | 11.1 | 15.3 | 9.3  | 9.1  | 12.6 | 10.4 | 6.7  | 10.2 | 9.5  |
| Antidepressant                        | 9.6  | 17.6 | 22.8 | 19.1 | 33.5 | 24.2 | 34.6 | 28.6 | 30.6 | 26.2 | 31.8 | 31.0 | 28.8 | 26.0 | 30.3 | 39.2 | 38.4 | 32.2 | 36.4 |
| Antiepileptic                         | 20.4 | 21.1 | 7.1  | 15.9 | 9.5  | 8.0  | 13.9 | 15.5 | 7.5  | 13.8 | 18.1 | 13.3 | 17.8 | 17.6 | 14.6 | 17.6 | 24.8 | 19.5 | 32.7 |
| Antidementia                          | N/A  | N/A  | N/A  | N/A  | N/A  | 1.0  | 1.2  | 34.1 | 46.5 | 39.9 | 47.2 | 41.3 | 52.4 | 48.1 | 51.5 | 45.7 | 45.9 | 54.5 | 46.1 |
| Opioid                                | 27.8 | 23.3 | 12.9 | 7.7  | 18.2 | 16.4 | 19.8 | 17.7 | 15.6 | 17.4 | 15.3 | 22.7 | 15.1 | 17.0 | 25.0 | 26.1 | 25.0 | 24.1 | 27.6 |
| <b>Health Events, %</b>               |      |      |      |      |      |      |      |      |      |      |      |      |      |      |      |      |      |      |      |
| Cardiovascular                        | 25.5 | 35.6 | 24.0 | 26.6 | 20.3 | 27.9 | 30.2 | 26.9 | 25.5 | 23.9 | 24.3 | 32.0 | 34.2 | 37.4 | 34.1 | 40.3 | 33.1 | 35.0 | 32.5 |
| Cerebrovascular                       | 0.0  | 0.0  | 0.0  | 0.0  | 0.5  | 1.6  | 1.7  | 3.6  | 6.9  | 4.7  | 3.2  | 4.8  | 2.0  | 1.1  | 0.7  | 0.3  | 3.4  | 0.0  | 0.0  |
| Falls and/or fractures                | 19.3 | 19.7 | 21.5 | 15.5 | 19.1 | 12.5 | 12.7 | 10.3 | 7.6  | 8.6  | 10.7 | 8.5  | 4.8  | 8.7  | 8.1  | 6.8  | 4.7  | 4.0  | 11.4 |
| Two-year mortality                    | 25.1 | 7.7  | 8.4  | 9.5  | 7.9  | 6.7  | 6.0  | 7.4  | 9.1  | 5.5  | 10.3 | 6.9  | 8.8  | 4.6  | 5.0  | 14.1 | 8.3  | 7.5  | 10.1 |
| <b>Health-Related Quality of Life</b> |      |      |      |      |      |      |      |      |      |      |      |      |      |      |      |      |      |      |      |
| SF-12 PCS, mean                       | N/A  | N/A  | N/A  | N/A  | 30.8 | 31.2 | 30.8 | 32.6 | 32.4 | 32.9 | 33.6 | 32.6 | 33.3 | 32.2 | 32.1 | 30.3 | 30.3 | 30.8 | 34.8 |
| SF-12 MCS, mean                       | N/A  | N/A  | N/A  | N/A  | 41.1 | 43.5 | 42.6 | 44.2 | 43.5 | 43.6 | 41.9 | 43.1 | 42.8 | 43.3 | 44.7 | 45.1 | 43.7 | 44.6 | 44.2 |

Abbreviations: meds., medications; MEPS, Medical Expenditure Panel Survey; N/A, not available; MCS, mental component summary; PCS, physical component summary; SF-12, 12-Item Short-Form Health Survey.

**eTable 6.** Annual Weighted Data from NAMCS/NHAMCS

| Calendar Year                 | 1996 | 1997 | 1998 | 1999 | 2000 | 2001 | 2002 | 2003 | 2004 | 2005 | 2006 | 2007 | 2008 | 2009 | 2010 | 2011 | 2012 | 2013 | 2014 |
|-------------------------------|------|------|------|------|------|------|------|------|------|------|------|------|------|------|------|------|------|------|------|
| <b>Unweighted Sample Size</b> | 165  | 210  | 227  | 177  | 223  | 245  | 285  | 294  | 291  | 254  | 275  | 345  | 313  | 268  | 294  | 312  | 153  | 121  | 134  |
| <b>Medication Use, %</b>      |      |      |      |      |      |      |      |      |      |      |      |      |      |      |      |      |      |      |      |
| Antipsychotic                 | 19.8 | 15.7 | 16.4 | 11.7 | 5.9  | 15.0 | 18.6 | 10.0 | 18.4 | 14.9 | 16.4 | 17.0 | 7.1  | 17.9 | 6.1  | 12.8 | 9.2  | 8.0  | 17.0 |
| Atypical antipsychotic        | 1.4  | 9.3  | 3.4  | 5.8  | 4.1  | 9.3  | 16.3 | 9.0  | 18.2 | 14.8 | 16.2 | 16.5 | 6.4  | 16.7 | 5.5  | 12.4 | 9.2  | 8.0  | 15.3 |
| Typical antipsychotic         | 18.5 | 6.4  | 13.0 | 5.9  | 1.9  | 5.7  | 2.3  | 1.3  | 0.2  | 0.3  | 0.6  | 0.7  | 0.8  | 1.2  | 0.7  | 0.8  | 0.1  | 0.0  | 1.7  |
| Psychiatric meds/opioids      | 33.3 | 53.6 | 41.7 | 47.7 | 47.6 | 45.2 | 52.6 | 54.1 | 65.4 | 48.8 | 65.9 | 56.4 | 62.8 | 71.7 | 63.9 | 66.4 | 61.4 | 48.0 | 67.6 |
| Hypnotic                      | 14.5 | 18.2 | 12.4 | 8.1  | 14.6 | 13.7 | 18.2 | 10.5 | 13.0 | 15.6 | 12.6 | 11.3 | 16.7 | 17.1 | 19.5 | 15.1 | 18.0 | 10.0 | 10.2 |
| Antidepressant                | 9.1  | 26.5 | 19.3 | 25.8 | 16.1 | 13.1 | 20.3 | 26.6 | 30.4 | 15.6 | 29.0 | 21.4 | 27.2 | 25.7 | 22.2 | 26.0 | 29.8 | 24.3 | 32.4 |
| Antiepileptic                 | 6.9  | 12.6 | 4.1  | 9.4  | 7.2  | 11.1 | 6.9  | 5.2  | 13.7 | 3.1  | 10.1 | 12.4 | 11.9 | 17.8 | 16.7 | 15.3 | 13.2 | 7.7  | 17.9 |
| Antidementia                  | 10.4 | 13.4 | 11.0 | 28.9 | 25.5 | 21.7 | 27.1 | 28.2 | 47.1 | 37.8 | 46.1 | 33.3 | 42.1 | 51.2 | 42.6 | 42.8 | 45.1 | 30.8 | 50.9 |
| Opioid                        | 2.5  | 8.2  | 0.8  | 2.4  | 2.0  | 4.3  | 4.7  | 4.9  | 5.9  | 3.6  | 8.8  | 5.9  | 6.2  | 4.0  | 5.1  | 6.4  | 14.2 | 12.0 | 7.3  |
| <b>Health Events, %</b>       |      |      |      |      |      |      |      |      |      |      |      |      |      |      |      |      |      |      |      |
| Cardiovascular                | 4.8  | 0.6  | 4.1  | 0.2  | 1.6  | 5.2  | 2.8  | 2.7  | 0.9  | 0.8  | 8.9  | 1.6  | 1.0  | 3.9  | 5.9  | 7.4  | 4.8  | 17.3 | 8.0  |
| Cerebrovascular               | 0.3  | 1.7  | 0.7  | 5.6  | 1.8  | 0.3  | 1.2  | 1.0  | 0.0  | 0.7  | 4.4  | 1.1  | 2.9  | 0.7  | 1.3  | 0.6  | 3.1  | 7.2  | 0.6  |
| Falls and/or fractures        | 5.4  | 2.1  | 1.6  | 1.0  | 0.8  | 1.6  | 0.5  | 1.1  | 1.1  | 0.3  | 0.8  | 0.2  | 0.2  | 0.7  | 1.8  | 1.4  | 4.2  | 0.9  | 2.4  |

Abbreviations: meds., medications; NAMCS, National Ambulatory Medical Care Survey; NHAMCS, National Hospital Ambulatory Medical Care Survey.

**eTable 7.** Three-Year Moving Averages from MEPS

| Midpoint Year                         | 1997 | 1998 | 1999 | 2000 | 2001 | 2002 | 2003 | 2004 | 2005 | 2006 | 2007 | 2008 | 2009  | 2010 | 2011 | 2012 | 2013 |
|---------------------------------------|------|------|------|------|------|------|------|------|------|------|------|------|-------|------|------|------|------|
| <b>Medication Use, %</b>              |      |      |      |      |      |      |      |      |      |      |      |      |       |      |      |      |      |
| Antipsychotic                         | 1.7  | 3.0  | 3.3  | 7.4  | 8.9  | 8.2  | 7.6  | 6.6  | 9.2  | 9.6  | 11.5 | 12.4 | 11.7  | 10.6 | 7.5  | 7.6  | 10.7 |
| Atypical antipsychotic                | 0.5  | 2.0  | 3.0  | 7.2  | 8.4  | 8.0  | 7.4  | 6.3  | 8.2  | 8.5  | 10.5 | 11.6 | 10.3  | 8.9  | 6.2  | 6.8  | 9.7  |
| Typical antipsychotic                 | 1.2  | 1.0  | 0.3  | 0.3  | 0.5  | 0.2  | 0.2  | 0.3  | 0.9  | 1.3  | 1.5  | 1.5  | 1.8   | 2.0  | 1.6  | 1.0  | 1.0  |
| Psychiatric meds/opioids              | 46.5 | 42.3 | 42.5 | 43.2 | 50.3 | 57.5 | 66.5 | 68.7 | 69.9 | 71.2 | 73.9 | 71.8 | 71.8  | 72.3 | 73.4 | 75.4 | 77.0 |
| Hypnotic                              | 20.0 | 18.1 | 13.1 | 13.0 | 13.2 | 17.7 | 18.0 | 15.5 | 12.3 | 12.3 | 11.9 | 11.2 | 10.3  | 10.7 | 9.9  | 9.1  | 8.8  |
| Antidepressant                        | 16.7 | 19.8 | 25.1 | 25.6 | 30.8 | 29.1 | 31.3 | 28.5 | 29.5 | 29.7 | 30.5 | 28.6 | 28.4  | 31.8 | 36.0 | 36.6 | 35.7 |
| Antiepileptic                         | 16.2 | 14.7 | 10.8 | 11.1 | 10.5 | 12.5 | 12.3 | 12.3 | 13.1 | 15.0 | 16.4 | 16.2 | 16.7  | 16.6 | 19.0 | 20.6 | 25.7 |
| Antidementia                          | N/A  | N/A  | N/A  | N/A  | N/A  | 12.1 | 27.3 | 40.2 | 44.5 | 42.8 | 47.0 | 47.3 | 50.7  | 48.4 | 47.7 | 48.7 | 48.8 |
| Opioid                                | 21.3 | 14.6 | 12.9 | 14.1 | 18.1 | 18.0 | 17.7 | 16.9 | 16.1 | 18.5 | 17.7 | 18.3 | 19.0  | 22.7 | 25.4 | 25.1 | 25.7 |
| <b>Health Events, %</b>               |      |      |      |      |      |      |      |      |      |      |      |      |       |      |      |      |      |
| Cardiovascular                        | 28.4 | 28.7 | 23.6 | 24.9 | 26.1 | 28.3 | 27.5 | 25.4 | 24.6 | 26.7 | 30.2 | 34.5 | 35.23 | 37.7 | 35.8 | 36.1 | 33.5 |
| Cerebrovascular                       | 0.0  | 0.0  | 0.2  | 0.7  | 1.3  | 2.3  | 4.1  | 5.1  | 4.9  | 4.2  | 3.3  | 2.6  | 1.27  | 0.7  | 1.5  | 1.2  | 1.1  |
| Falls and/or fractures                | 20.2 | 18.9 | 18.7 | 15.7 | 14.8 | 11.8 | 10.2 | 8.8  | 9.0  | 9.3  | 8.0  | 7.3  | 7.20  | 7.7  | 6.5  | 5.2  | 6.7  |
| Two-year mortality                    | 13.7 | 8.5  | 8.6  | 8.0  | 6.9  | 6.7  | 7.5  | 7.3  | 8.3  | 7.6  | 8.7  | 6.8  | 6.13  | 7.9  | 9.1  | 10.0 | 8.6  |
| <b>Health-related Quality of Life</b> |      |      |      |      |      |      |      |      |      |      |      |      |       |      |      |      |      |
| SF-12 PCS, mean                       | N/A  | N/A  | N/A  | N/A  | 30.9 | 31.5 | 31.9 | 32.6 | 33.0 | 33.0 | 33.1 | 32.7 | 32.5  | 31.6 | 30.9 | 30.5 | 32.0 |
| SF-12 MCS, mean                       | N/A  | N/A  | N/A  | N/A  | 42.4 | 43.4 | 43.5 | 43.8 | 43.0 | 42.9 | 42.6 | 43.1 | 43.6  | 44.3 | 44.5 | 44.5 | 44.2 |

Abbreviations: meds., medications; MCS, mental component summary; MEPS, Medical Expenditure Panel Survey; N/A, not available; PCS, physical component summary; SF-12, 12-Item Short-Form Health Survey.

**eTable 8.** Three-Year Moving Averages from NAMCS/NHAMCS

| Midpoint Year            | 1997 | 1998 | 1999 | 2000 | 2001 | 2002 | 2003 | 2004 | 2005 | 2006 | 2007 | 2008 | 2009 | 2010 | 2011 | 2012 | 2013 |
|--------------------------|------|------|------|------|------|------|------|------|------|------|------|------|------|------|------|------|------|
| <b>Medication Use, %</b> |      |      |      |      |      |      |      |      |      |      |      |      |      |      |      |      |      |
| Antipsychotic            | 17.3 | 14.6 | 11.3 | 10.9 | 13.2 | 14.5 | 15.7 | 14.4 | 16.6 | 16.1 | 13.5 | 14.0 | 10.4 | 12.3 | 9.4  | 10.0 | 11.4 |
| Atypical antipsychotic   | 4.7  | 6.2  | 4.4  | 6.4  | 9.9  | 11.5 | 14.5 | 14.0 | 16.4 | 15.8 | 13.0 | 13.2 | 9.5  | 11.5 | 9.0  | 9.9  | 10.8 |
| Typical antipsychotic    | 12.6 | 8.4  | 6.9  | 4.5  | 3.3  | 3.1  | 1.3  | 0.6  | 0.4  | 0.5  | 0.7  | 0.9  | 0.9  | 0.9  | 0.5  | 0.3  | 0.6  |
| Psychiatric meds/opioids | 42.9 | 47.7 | 45.7 | 46.8 | 48.5 | 50.6 | 57.4 | 56.1 | 60.0 | 57.0 | 61.7 | 63.6 | 66.1 | 67.3 | 63.9 | 58.6 | 59.0 |
| Hypnotic                 | 15.0 | 12.9 | 11.7 | 12.1 | 15.5 | 14.1 | 13.9 | 13.0 | 13.7 | 13.2 | 13.5 | 15.0 | 17.8 | 17.2 | 17.5 | 14.4 | 12.7 |
| Antidepressant           | 18.3 | 23.9 | 20.4 | 18.3 | 16.5 | 20.0 | 25.8 | 24.2 | 25.0 | 22.0 | 25.9 | 24.8 | 25.0 | 24.6 | 26.0 | 26.7 | 28.8 |
| Antiepileptic            | 7.9  | 8.7  | 6.9  | 9.2  | 8.4  | 7.7  | 8.6  | 7.3  | 9.0  | 8.5  | 11.5 | 14.0 | 15.5 | 16.6 | 15.1 | 12.1 | 12.9 |
| Antidementia             | 11.6 | 17.8 | 21.8 | 25.4 | 24.8 | 25.7 | 34.1 | 37.7 | 43.7 | 39.1 | 40.5 | 42.2 | 45.3 | 45.5 | 43.5 | 39.6 | 42.3 |
| Opioid                   | 3.8  | 3.8  | 1.7  | 2.9  | 3.7  | 4.6  | 5.2  | 4.8  | 6.1  | 6.1  | 7.0  | 5.4  | 5.1  | 5.2  | 8.6  | 10.9 | 11.2 |
| <b>Health Events, %</b>  |      |      |      |      |      |      |      |      |      |      |      |      |      |      |      |      |      |
| Cardiovascular           | 3.2  | 1.6  | 2.0  | 2.3  | 3.2  | 3.6  | 2.1  | 1.5  | 3.5  | 3.8  | 3.8  | 2.2  | 3.6  | 5.7  | 6.0  | 9.8  | 10.0 |
| Cerebrovascular          | 0.9  | 2.7  | 2.7  | 2.6  | 1.1  | 0.8  | 0.7  | 0.6  | 1.7  | 2.1  | 2.8  | 1.6  | 1.6  | 0.9  | 1.7  | 3.6  | 3.6  |
| Falls and/or fractures   | 3.0  | 1.6  | 1.1  | 1.1  | 1.0  | 1.1  | 0.9  | 0.8  | 0.7  | 0.4  | 0.4  | 0.4  | 0.9  | 1.3  | 2.5  | 2.2  | 2.5  |

Abbreviations: meds., medications; NAMCS, National Ambulatory Medical Care Survey; NHAMCS, National Hospital Ambulatory Medical Care Survey.

## **eAppendix.** Interrupted Time-Series Analyses

The interrupted time-series analyses were performed by fitting a series of multiple regression equations of the form  $\bar{Y}_t = \beta_0 + \beta_1 T_t + \beta_2 X_t + \beta_3 T_t X_t + \varepsilon_t$ , where  $\bar{Y}_t$  is the 3-year moving average, centered on  $t$ , of the weighted annual summary values of outcome  $Y$ ;  $T$  is the number of years since the start of the series (ie, since 1997);  $X$  indicates that an observation occurred before ( $X = 0$ ) or after ( $X = 1$ ) the FDA warning in 2005;  $t$  represents indexes years (from 1997 to 2013); and  $\varepsilon_t$  is an autocorrelated idiosyncratic error term. The impact of the 2005 warning can be derived from  $\beta_1$ , which is the prewarning annual rate of change (ie, slope) in  $\bar{Y}$ ;  $\beta_2$ , which is the immediate change (ie, level change) in  $\bar{Y}$  due to the intervention; and  $\beta_1 + \beta_3$ , which is the postwarning annual rate of change (slope) in  $\bar{Y}$  ( $\beta_3$  is, therefore, the difference between the rates of change). Newey-West standard errors (and, therefore, confidence intervals) of the coefficients were estimated to account for autocorrelation; the standard errors for  $\beta_1 + \beta_3$  were estimated using the delta method.

**eFigure.** Proportion of Elderly Individuals with Dementia Who Have Used Antidementia Medications (MEPS) and Proportion of Visits for AD Recording Use of Antidementia Medications (NAMCS/NHAMCS)

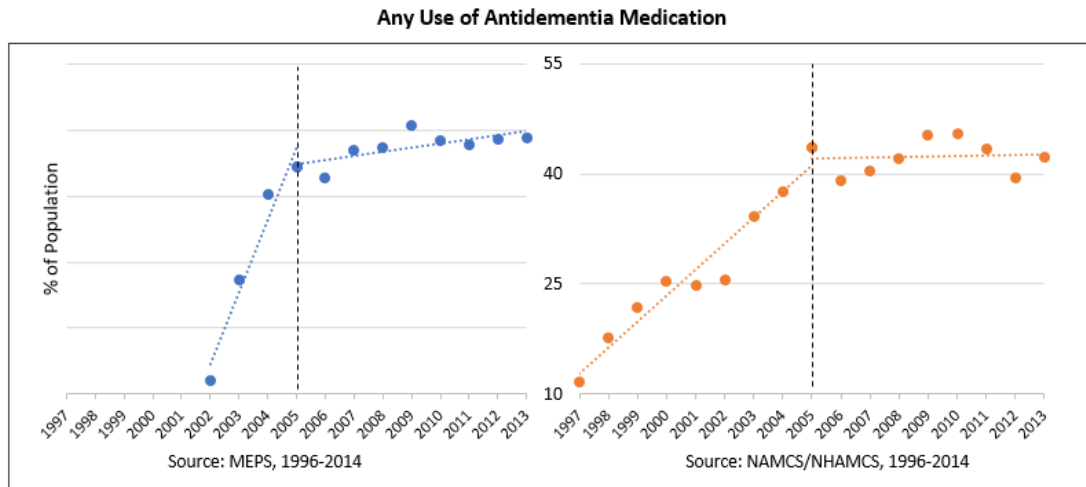

Abbreviations: MEPS, Medical Expenditure Panel Survey; NAMCS, National Ambulatory Medical Care Survey; NHAMCS, National Hospital Ambulatory Medical Care Survey.

Values represent 3-year moving averages.

NOTE: MEPS obtains data on health conditions at multiple points during a 30-month period while NAMCS/NHAMCS obtains data from medical records corresponding to a sampled visit.
